# Supplementary material
Source: publisher site journal article supplement (https://www.spandidos-publications.com/1012/downloadSupplementary)

Figure S1. Cell cycle analysis in BCL11A-knockdown triple-negative breast cancer cells. MDA-MB-231 cells were infected with (A) mock, (B) sh-NC or (C) sh-BCL11A. Flow cytometry was used to detect the percentage of G0/G1, S and G2 phase of MDA-MB-231 cells. Results were analyzed using ModFit software. Hs578T cells were infected with (D) mock, (E) sh-NC or (F) sh-BCL11A. Flow cytometry was used to detect the percentage of G0/G1, S and G2 phase of Hs578T cells. Results were reported using ModFit software. BCL11A, B-cell lymphoma/leukemia 11A; sh, small hairpin; NC, negative control.

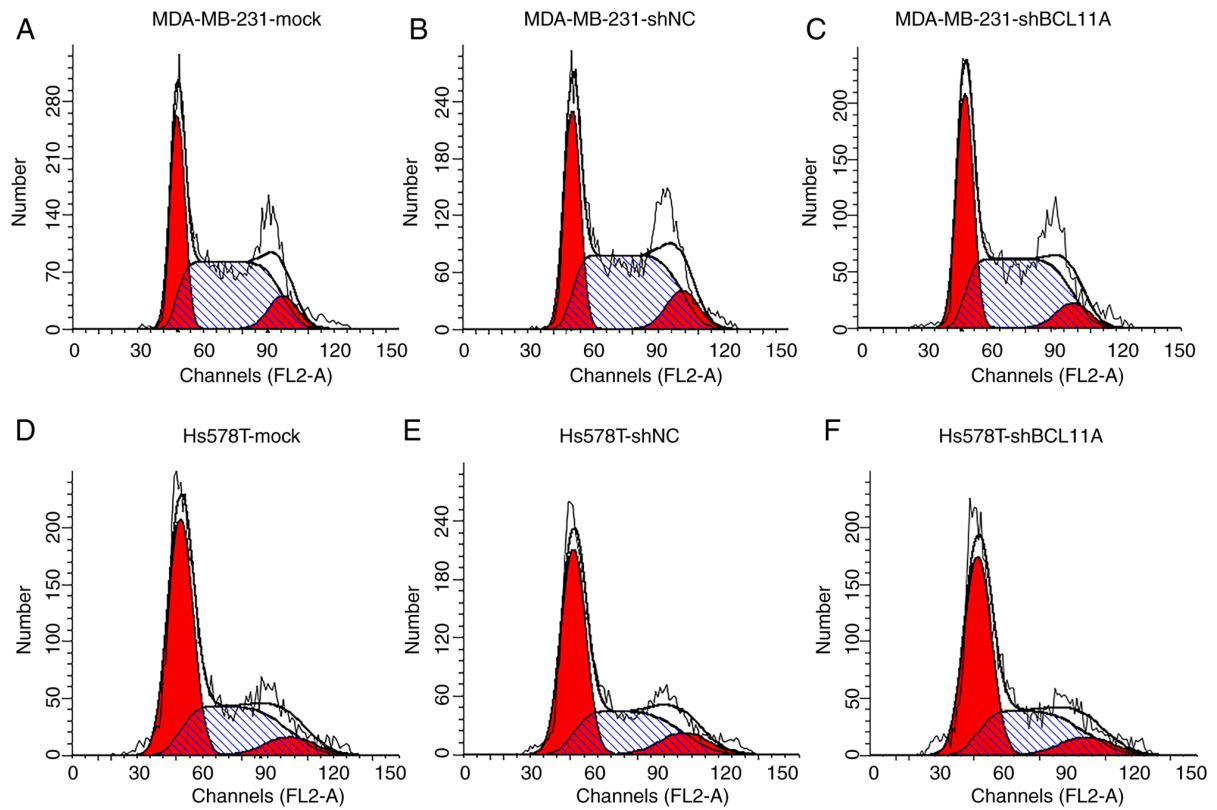

Supplement: Supplementary file 1 [file downloadSupplementary]
